# Supplementary material
Source: ML conference proceedings conference paper supplement (https://proceedings.neurips.cc/paper_files/paper/2016/hash/ed265bc903a5a097f61d3ec064d96d2e-Abstract.html)
Supplement: Supplementary file [file ed265bc903a5a097f61d3ec064d96d2e-Supplemental.zip]

## A Neural network architecure for CIFAR-10 experiments

| Layer type                     | # channels | $x, y$ dimension |
|--------------------------------|------------|------------------|
| raw RGB input                  | 3          | 32               |
| ZCA whitening                  | 3          | 32               |
| Gaussian noise $\sigma = 0.15$ | 3          | 32               |
| $3 \times 3$ conv leaky ReLU   | 96         | 32               |
| $3 \times 3$ conv leaky ReLU   | 96         | 32               |
| $3 \times 3$ conv leaky ReLU   | 96         | 32               |
| $2 \times 2$ max pool, str. 2  | 96         | 16               |
| dropout with $p = 0.5$         | 96         | 16               |
| $3 \times 3$ conv leaky ReLU   | 192        | 16               |
| $3 \times 3$ conv leaky ReLU   | 192        | 16               |
| $3 \times 3$ conv leaky ReLU   | 192        | 16               |
| $2 \times 2$ max pool, str. 2  | 192        | 8                |
| dropout with $p = 0.5$         | 192        | 8                |
| $3 \times 3$ conv leaky ReLU   | 192        | 6                |
| $1 \times 1$ conv leaky ReLU   | 192        | 6                |
| $1 \times 1$ conv leaky ReLU   | 192        | 6                |
| global average pool            | 192        | 1                |
| softmax output                 | 10         | 1                |

Table 1: Neural network architecture for CIFAR-10.
